# Supplementary material for: C13 Megastigmane Derivatives From Epipremnum pinnatum: β-Damascenone Inhibits the Expression of Pro-Inflammatory Cytokines and Leukocyte Adhesion Molecules as Well as NF-κB Signaling
Source: Front Pharmacol. 2019 Nov 28;10:1351. doi: 10.3389/fphar.2019.01351 (PMC6892967; doi:10.3389/fphar.2019.01351)
Supplement: Supplementary file 1 [file DataSheet_1.docx]

**C13 Megastigmane Derivatives from Epipremnum pinnatum ̶
β-Damascenone Inhibits the Expression of Pro-inflammatory Cytokines and Leukocyte Adhesion Molecules as well as NF-κB signaling**

**San-Po Pan1, Teresa Pirker1, Olaf Kunert2, Nadine Kretschmer1, Scarlet Hummelbrunner3, Simone L. Latkolik3, Julia Rappai3, Verena Dirsch3, Valery Bochkov2, Rudolf Bauer*1**

1Institute of Pharmaceutical Sciences, Department of Pharmacognosy, University of Graz, Graz, Austria

2Institute of Pharmaceutical Sciences, Department of Pharmaceutical Chemistry, University of Graz, Graz, Austria

3Department of Pharmacognosy, Molecular Targets, University of Vienna, Vienna, Austria

*** Correspondence:**Rudolf Bauer
rudolf.bauer@uni-graz.at

**Supplementary data**

**List of Figures and tables**

Figure S1.  1H spectrum of **1**

Figure S2. HSQC spectrum of **1**

Figure S3. 1H NMR spectrum of **2** and **3**

Figure S4. HSQC spectrum of compound **2** and **3**

Figure S5. GC-MS chromatogram of identified megastigmane aglycones **10-13**

Figure S6. EI Mass spectrum (GC-MS) of β-damascenone **(10)** compared to library data

Figure S7. EI Mass spectrum (GC-MS) of megastigmatrienone **(11)** compared to library data

Figure S8. EI Mass spectrum (GC-MS) of 3-Oxo-7,8-dihydro-alpha-ionol **(12)** compared to library data

Figure S9. EI Mass spectrum (GC-MS) of 3-Hydroxy-beta-damascone **(13)** compared to library data

Table S1. NMR Spectroscopic Data [methanol-d4, 599.85 MHz (1H) and 150.84 MHz (13C), δ (ppm)] of **1 - 3**

**
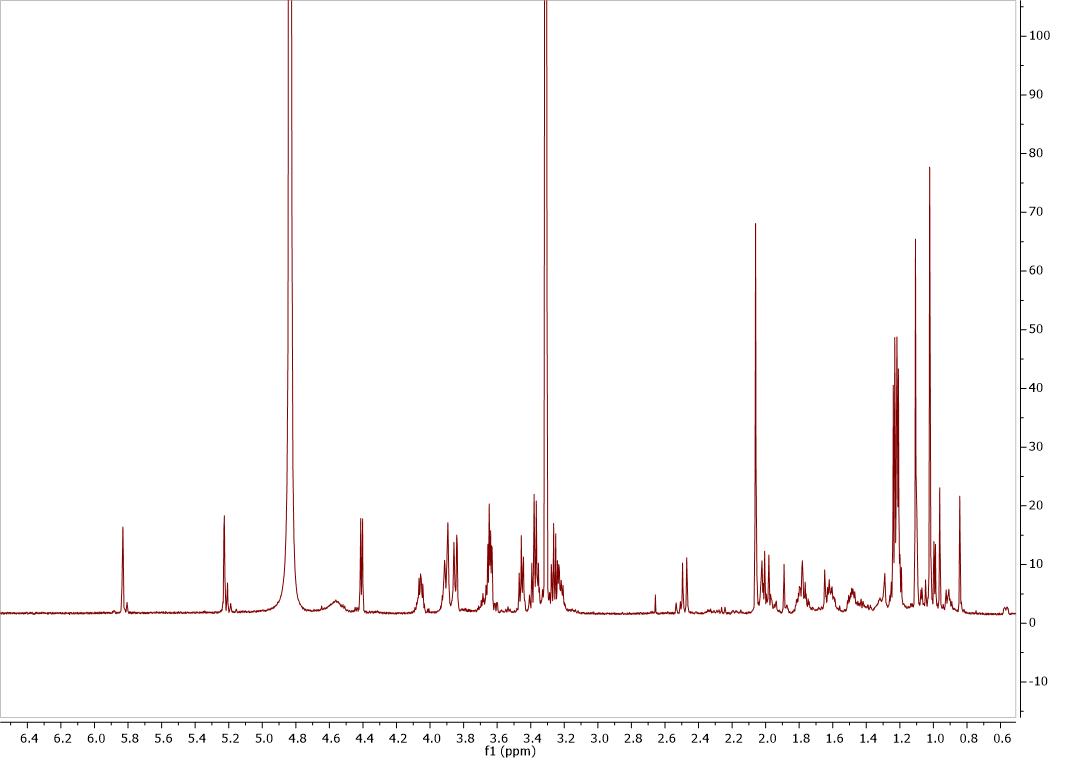
**

**Figure 1.** 1H spectrum of **1**

**
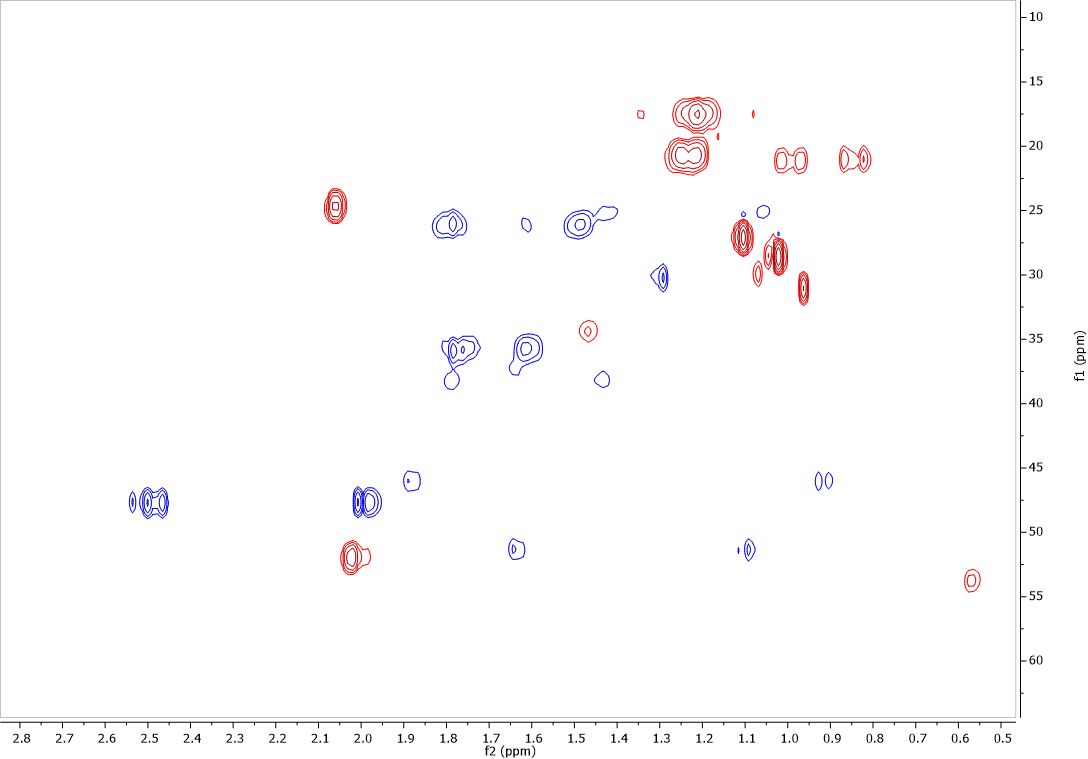
**

**Figure 2.** HSQC spectrum of **1**

**
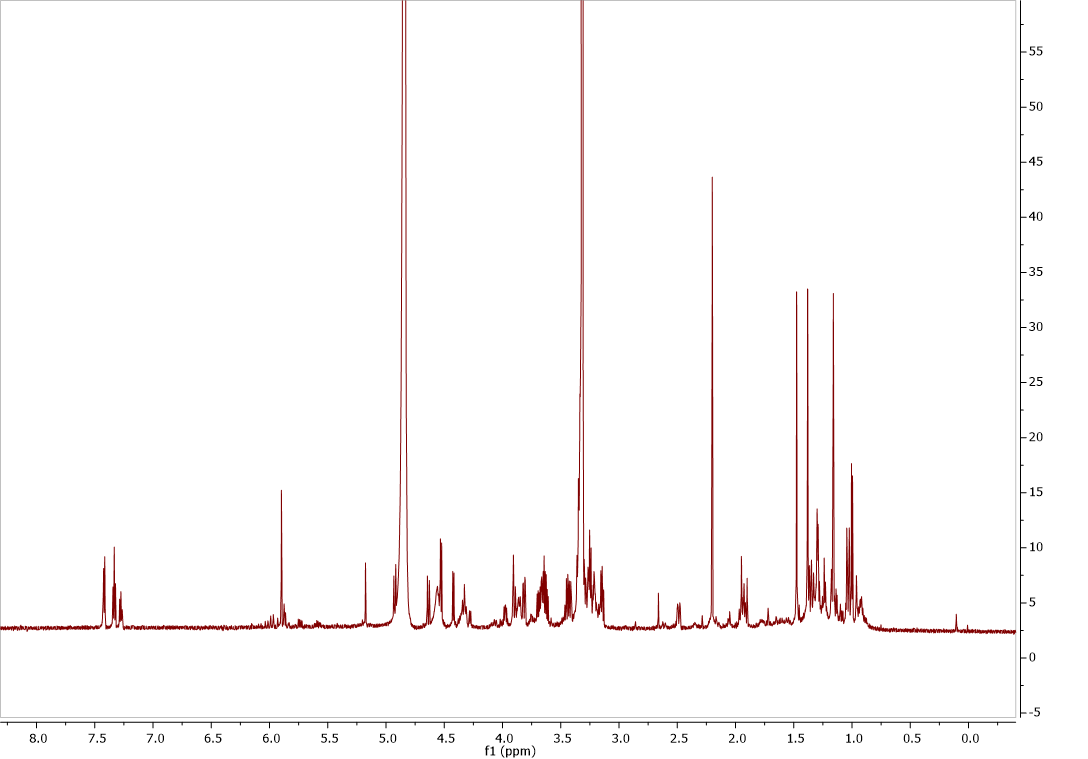
**

**Figure 3.** 1H NMR spectrum of **2** and **3**

**
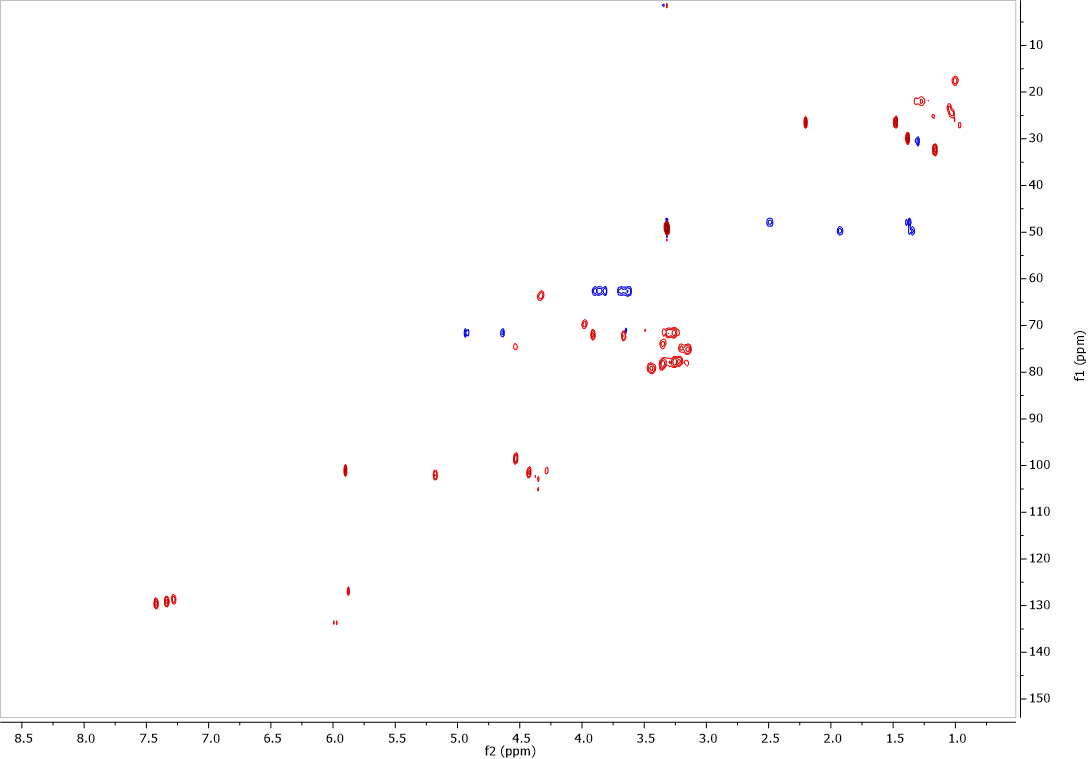
**

**Figure 4.** HSQC spectrum of **2** and **3**


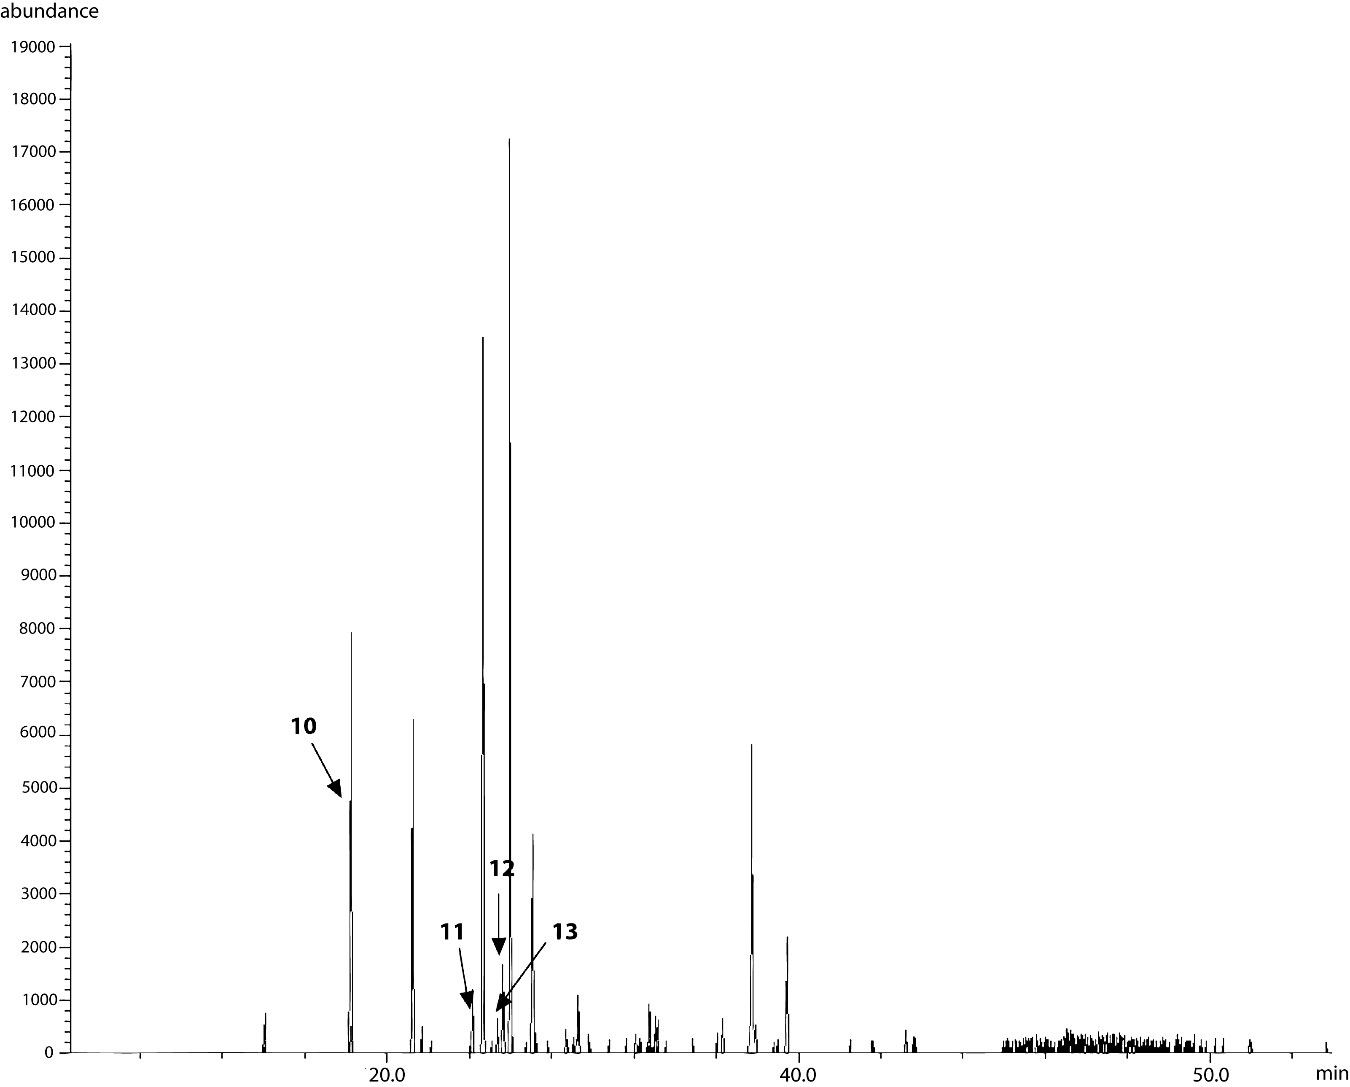


**Figure S5**. GC-MS chromatogram of identified megastigmane aglycones **10-13**.


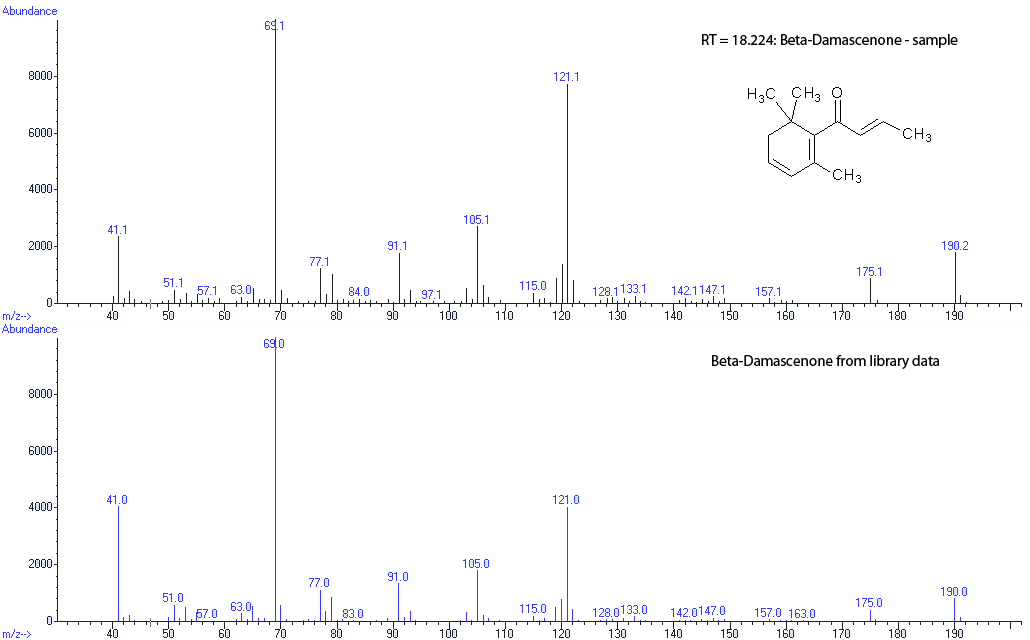


**Figure S6.** EI Mass spectrum (GC-MS) of β-damascenone **(10)** compared to library data


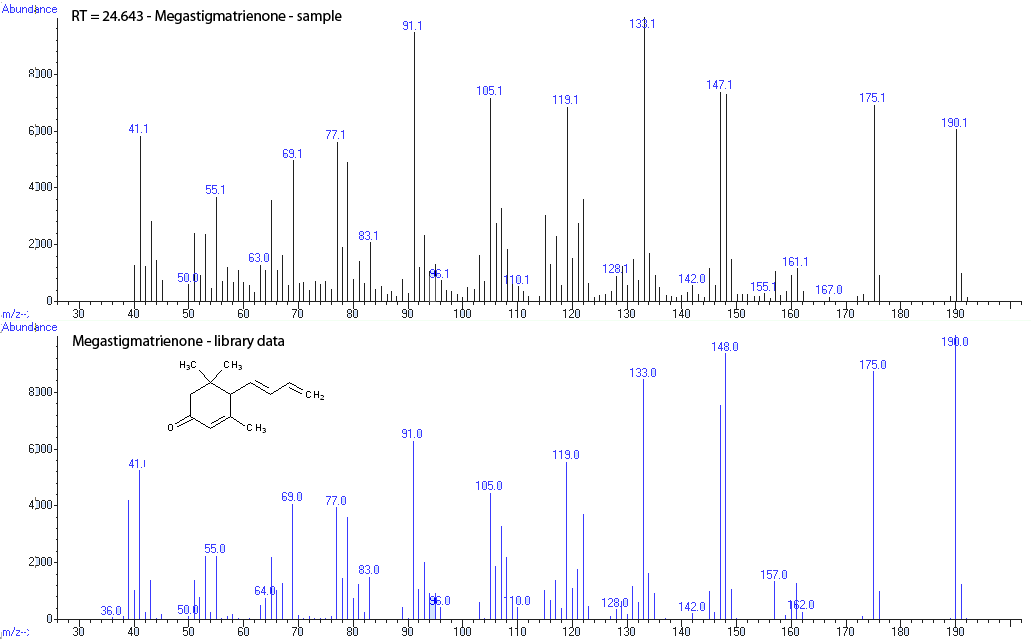


**Figure S7.** EI Mass spectrum (GC-MS) of megastigmatrienone **(11)** compared to library data


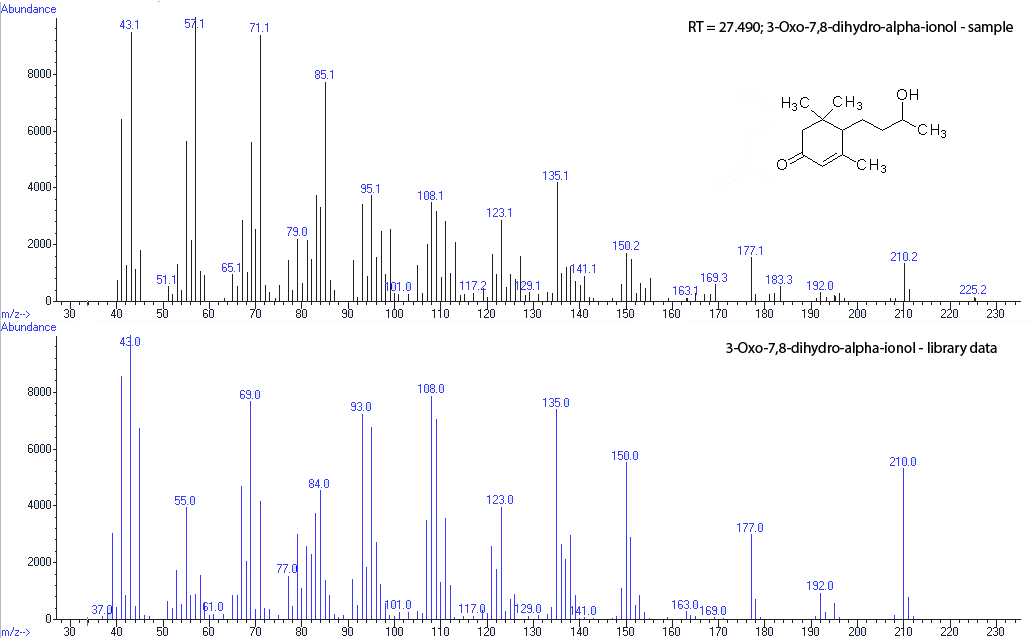


**Figure S8.** EI Mass spectrum (GC-MS) of 3-Oxo-7,8-dihydro-alpha-ionol **(12)** compared to library data


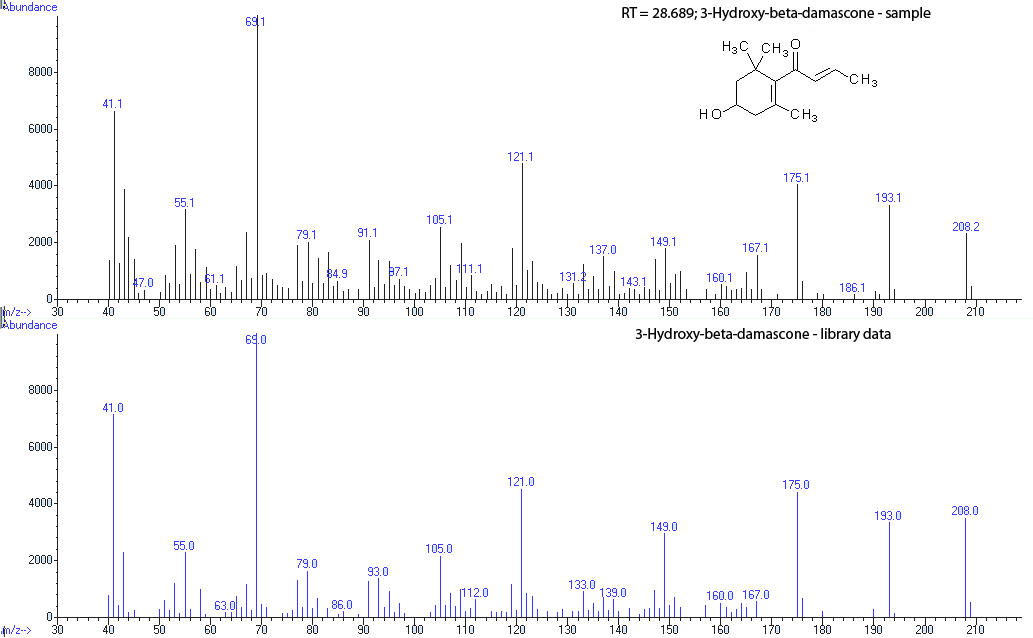


**Figure S9.** EI Mass spectrum (GC-MS) of 3-Hydroxy-beta-damascone **(13)** compared to library data

**Table S1.** NMR spectroscopic data [methanol-d4, 599.85 MHz (1H) and 150.84 MHz (13C), δ (ppm)] of **1 - 3**

|  | **Gusanlungionoside C**  **(1)** | | **Phenylmethyl-2-O-(6-O-rhamnosyl)-ß-D-galactopyranoside (2)** | | **Citroside A**  **(3)** | |
| --- | --- | --- | --- | --- | --- | --- |
| Position | δC | δH (J in Hz) | δC | δH (J in Hz) | δC | δH (J in Hz) |
| 1 | 37.0, C | - | 138.4, C | - | 37.0, C | - |
| 2 | 47.6, CH2 | 2.50, 1.98 d (16 Hz) | 129.7, C | 7.42 (d; 7.6 Hz) | 49.7, C | 1.95, 1.36 |
| 3 | 202.0, C | - | 129.0, C | 7.33 (t; 7.5 Hz) | 63.5, C | 4.35 |
| 4 | 125.0, CH | 5.83 s | 128.7, C | 7.28 (t; 7.5 Hz) | 47.9, CH2 | 2.50, 1.41 |
| 5 | 169.6, C | - | 129.0, C | 7.33 (t; 7.5 Hz) | 78.4, C | - |
| 6 | 52.1, C | 2.02 m | 129.7, C | 7.42 (d; 7.6 Hz) | 118.9, C | - |
| 7 | 26.1, CH2 | 1.80, 1.48 m | 71.5, CH2 | 4.64 (d; 11.3 Hz)  4.94 (d; 11.3 Hz) | n. d. | - |
| 8 | 35.9, CH2 | 1.78, 1.62 m |  |  | 101.1, CH | 5.90 s |
| 9 | 75.1, CH | 3.90 m |  |  | 200.4, C | - |
| 10 | 20.7, CH3 | 1.23 d |  |  | 26.6, CH3 | 2.20 s |
| 11 | - | - |  |  | 32.4, CH3 | 1.16 s |
| 12 | - | - |  |  | 29.9, CH3 | 1.40 s |
| 13 | 24.8, CH3 | 2.06 s |  |  | 26.4, CH3 | 1.48 s |
| 1´ | 100.5, CH | 4.40 d (7.8 Hz) | 101.6, CH | 4.42 (d; 7.2 Hz) | 98.6, CH | 4.53 (d; 7.7 Hz) |
| 2´ | 78.3, CH | 3.37 m | 79.2, CH | 3.44 m | 75.1, CH | 3.15 |
| 3´ | 78.9, CH | 3.45 t | 77.6, CH | 3.29 m | 78.3, CH | 3.36 |
| 4´ | 71.6, CH | 3.26 m | 71.4, CH | 3.28 m | 71.6, CH | 3.26 |
| 5´ | 77.3, CH | 3.23 m | n. d. | n. d. | overlapped |  |
| 6´ | 62.2, CH2 | 3.84, 3.65 m | 62.6, CH2 | 3.87, 3.68 m | overlapped |  |
| 1´´ | 101.4, CH | 5.22 d (1.4 Hz) | 102.1, CH | 5.20 (s; brs) |  |  |
| 2´´ | 71.7, CH | 3.90 m | 72.0, CH | 3.91 m |  |  |
| 3´´ | 72.0, CH | 3.63 m | 72.2, CH | 3.68 m |  |  |
| 4´´ | 73.5, CH | 3.38 m | 73.9, CH | 3.35 m |  |  |
| 5´´ | 69.5, CH | 4.06 m | 69.6, CH | 3.98 m |  |  |
| 6´´ | 17.5, CH3 | 1.21 d (6 Hz) | 17.6, CH3 | 1.00 (d; 6.6 Hz) |  |  |
